# Supplementary material for: Anatomical adjustments of the tree hydraulic pathway decrease canopy conductance under long-term elevated CO2
Source: PubMed Central journal article supplement (PMC9806622; doi:10.1093/plphys/kiac482), 2022-10-17
Supplement: kiac482_supplementary_data.pdf [file kiac482_supplementary_data.pdf]

## Supplemental material to Gattmann et al. *Plant Physiology*

### Supplemental Methods S1. Non-linear model fitting.

The following models were fit via Bayesian calibration as described in the main text. The number of accounted auto-correlation structures (number of seedlings measured) per model is given.

#### 1) $g_c$ response to increasing vapor pressure deficit (VPD)

For both treatments (aCO<sub>2</sub>,  $n = 6$  and eCO<sub>2</sub>  $n = 6$ ) we assumed  $g_c$  to decline with VPD according to the following equation:

$$g_c = a_1 \text{VPD}^{b_1} \quad (\text{S1})$$

in which  $g_c$  is the canopy conductance in mol m<sup>-2</sup> s<sup>-1</sup>, VPD is the vapor pressure deficit in kPa, and  $a_1$  and  $b_1$  are the calibrated coefficients of the regression.

#### 2) $g_c$ response to declining midday leaf water potential ( $\Psi_{\text{leaf}}$ )

For the two treatments (aCO<sub>2</sub> and eCO<sub>2</sub>) we assumed a logistic decline of  $g_c$  following  $\Psi_{\text{leaf}}$  reductions, with a non-zero asymptote to represent minimum canopy conductance:

$$100 \cdot \left( \frac{g_c}{g_{c,\text{max}}} \right) = a_2 + \frac{(100-a_2)}{1 + \left( \frac{\Psi_{\text{leaf}}}{b_2} \right)^{c_2}} \quad (\text{S2})$$

in which  $100 \cdot \left( \frac{g_c}{g_{c,\text{max}}} \right)$  is the percentage of  $g_c$  with respect to the maximum canopy conductance, and  $\Psi_{\text{leaf}}$  is the midday leaf water potential (MPa). Regarding the calibrated coefficients,  $a_2$  is the percent of stomatal conductance relative to the maximum at the asymptote, which is the equivalent of minimum  $g_c$ .  $b_2$  is the leaf water potential at which the percent of  $g_c$  relative to maximum  $g_c$  is  $\frac{100+a_2}{2}$ , and  $c_2$  is a scaling factor.

#### 3) ABA response to declining midday leaf water potential ( $\Psi_{\text{leaf}}$ )

For the two treatments (aCO<sub>2</sub> and eCO<sub>2</sub>) we assumed a potential increase of ABA concentration with declining  $\Psi_{\text{leaf}}$  as follows:

$$\text{ABA} = a_4 \cdot (-\Psi_{\text{leaf}})^{b_4} \quad (\text{S4})$$

in which ABA is the concentration of abscisic acid in the leaves (ng g<sup>-1</sup>),  $\Psi_{\text{leaf}}$  is the midday leaf water potential (MPa), and  $a_4$  and  $b_4$  are the calibrated coefficients for the regression.

#### 4) Percent loss in conductance with declining xylem water potential ( $\Psi_{\text{xylem}}$ )

For both treatments (aCO<sub>2</sub>  $n = 5$  and eCO<sub>2</sub>  $n = 6$ ) we fitted a cumulative probability function in form of a Weibull distribution:

$$PLC = 100 \cdot \left( 1 - \exp \left( - \left( \frac{\Psi_{\text{xylem}}}{a_5} \right)^{b_5} \right) \right) \quad (\text{S5})$$

with PLC is the percent loss of hydraulic conductance (%),  $\Psi_{\text{xylem}}$  is the xylem water potential (MPa),  $a_5$  and  $b_5$  are the calibrated coefficients, where  $a_5$  is a scale parameter of reference xylem water potential value (MPa), and  $b_5$  a shape parameter.

**Supplemental Table S1.** Prior distributions of the Bayesian model calibrations. All priors are assumed to follow a uniform distribution, with minimum (min) and maximum (max) values as reported in the respective columns.

| Model                                       | Parameter | Distribution | Min  | Max  |
|---------------------------------------------|-----------|--------------|------|------|
| ABA vs $\Psi_{\text{leaf}}$                 | <i>a</i>  | Uniform      | 50   | 500  |
|                                             | <i>b</i>  | Uniform      | 0.1  | 2.5  |
| PLC vs $\Psi_{\text{xylem}}$                | <i>a</i>  | Uniform      | -6.5 | -2.5 |
|                                             | <i>b</i>  | Uniform      | 1    | 8    |
| $g_c$ vs VPD                                | <i>a</i>  | Uniform      | -3.5 | 0.5  |
|                                             | <i>b</i>  | Uniform      | -4   | -0.1 |
| $g_{c \text{ rel}}$ vs $\Psi_{\text{leaf}}$ | <i>a</i>  | Uniform      | 1    | 5    |
|                                             | <i>b</i>  | Uniform      | -0.5 | -2   |
|                                             | <i>c</i>  | Uniform      | 1.5  | 6    |

**Supplemental Table S2.** Parameter estimates of the Bayesian models. Model coefficients are given per treatment (eCO<sub>2</sub> = elevated CO<sub>2</sub>, aCO<sub>2</sub> = ambient CO<sub>2</sub>) and during decreasing CO<sub>2</sub> (from 900 to 400 to 200 ppm) in the eCO<sub>2</sub> seedlings. All parameter values are reported as the median and the 95% credible intervals per treatment. Bold letters indicate non-overlapping credible intervals between treatments for a given test. ABA is abscisic acid concentration (ng g<sup>-1</sup>),  $\Psi_{\text{leaf}}$  is midday leaf water potential (MPa), PLC is percent loss in xylem hydraulic conductance (%).  $\Psi_{\text{xylem}}$  is xylem water potential (MPa),  $g_c$  is canopy conductance (mol m<sup>-2</sup> s<sup>-1</sup>), PAR is photosynthetic active radiation (μmol m<sup>-2</sup> s<sup>-1</sup>), VPD is vapor pressure deficit (kPa) and  $g_{c,\text{rel}}$  is canopy conductance relative to the treatment-specific maximum canopy conductance (%).

|                                            | Treatment        | 2.5%CI       | Median       | 97.5%CI      | 2.5%CI | Median | 97.5%CI |        |        |         |
|--------------------------------------------|------------------|--------------|--------------|--------------|--------|--------|---------|--------|--------|---------|
| ABA vs $\Psi_{\text{leaf}}$                | eCO <sub>2</sub> | 62           | 159.6        | 283.4        | 0.99   | 1.37   | 1.93    |        |        |         |
|                                            | aCO <sub>2</sub> | 181.3        | 248.9        | 321.9        | 0.85   | 1.02   | 1.21    |        |        |         |
|                                            |                  | Coef a       |              |              | Coef b |        |         |        |        |         |
| PLC vs $\Psi_{\text{xylem}}$               | eCO <sub>2</sub> | -6.48        | -5.35        | -4.55        | 2.67   | 4.26   | 5.29    |        |        |         |
|                                            | aCO <sub>2</sub> | -6.47        | -5.38        | -4.58        | 3.57   | 4.66   | 7.99    |        |        |         |
|                                            |                  | Coef a       |              |              | Coef b |        |         |        |        |         |
| $g_c$ vs VPD                               | eCO <sub>2</sub> | <b>0.065</b> | <b>0.087</b> | <b>0.109</b> | -2.63  | -2.33  | -2.05   |        |        |         |
|                                            | aCO <sub>2</sub> | <b>0.173</b> | <b>0.202</b> | <b>0.405</b> | -2.48  | -1.68  | -1.37   | 2.5%CI | Median | 97.5%CI |
|                                            |                  | Coef a       |              |              | Coef b |        |         |        |        |         |
| $g_{c,\text{rel}}$ vs $\Psi_{\text{leaf}}$ | eCO <sub>2</sub> | 2.29         | 2.93         | 3.57         | -1.22  | -1.2   | -1.7    | 4.11   | 4.47   | 4.89    |
|                                            | aCO <sub>2</sub> | 2.11         | 2.76         | 3.39         | -1.27  | -1.24  | -1.21   | 4.31   | 4.64   | 5.11    |
|                                            |                  | Coef a       |              |              | Coef b |        |         | Coef c |        |         |

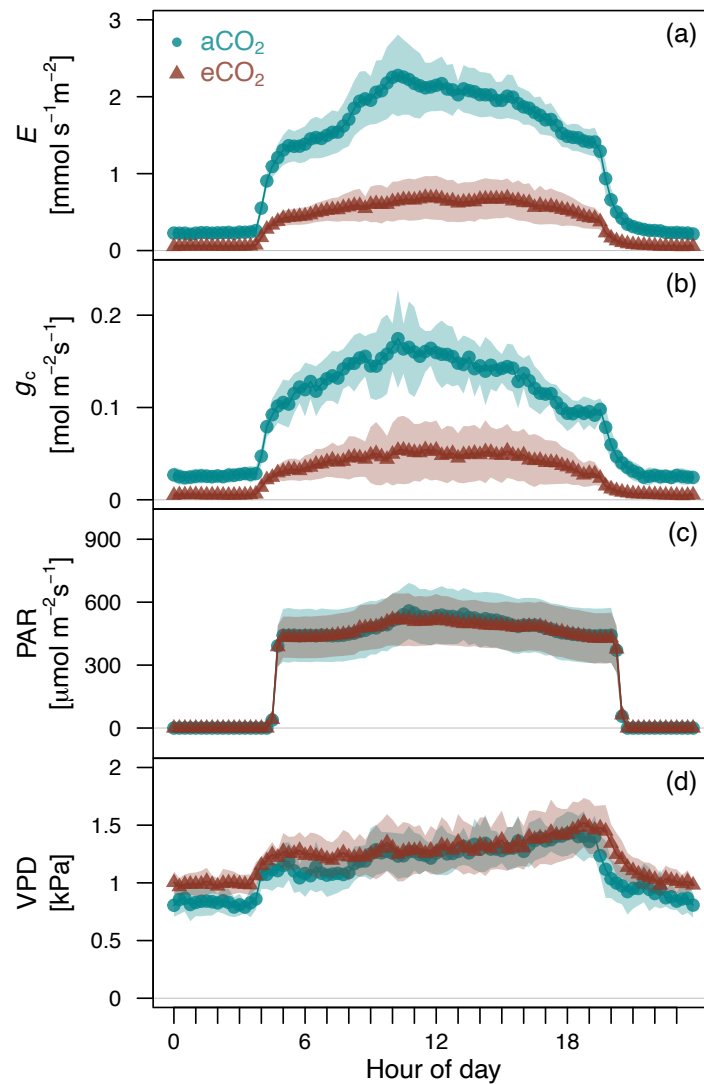

**Supplemental Figure S1.** Leaf-level gas exchange. Diurnal course of leaf-level transpiration ( $E$ ) (a) and canopy conductance ( $g_c$ ) (b) as well as photosynthetic active radiation (PAR) (c) and vapor pressure deficit (VPD) (d) under ambient (aCO<sub>2</sub>) and elevated [CO<sub>2</sub>] (eCO<sub>2</sub>). Shown are quarter-hourly treatment means over three (aCO<sub>2</sub>) and four (eCO<sub>2</sub>) days of acclimation with shaded areas depicting  $\pm$  standard deviation ( $n = 6$  seedling per treatment).

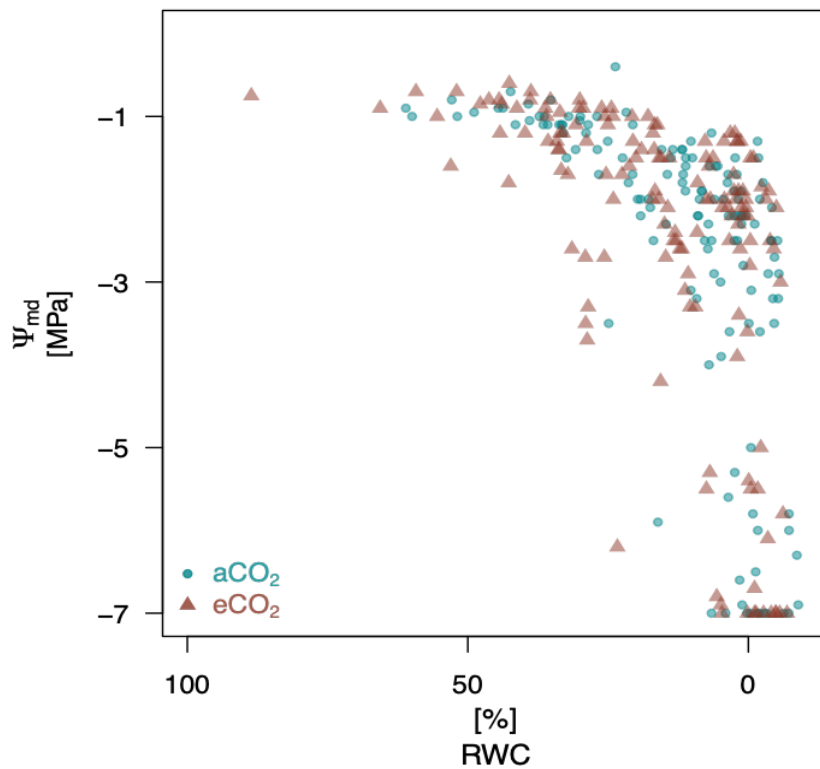

**Supplemental Figure S2.** Midday leaf water potential during soil drought. Midday leaf water potential ( $\Psi_{md}$ ) versus daily-averaged relative soil water content (RWC) during the course of a lethal soil drought for aCO<sub>2</sub> and eCO<sub>2</sub> Aleppo pine seedlings ( $n = 18$  per treatment). Shown are individual  $\Psi_{md}$  measurements (aCO<sub>2</sub>: solid points; eCO<sub>2</sub>: solid triangles). See also Gattmann et al. (2021).

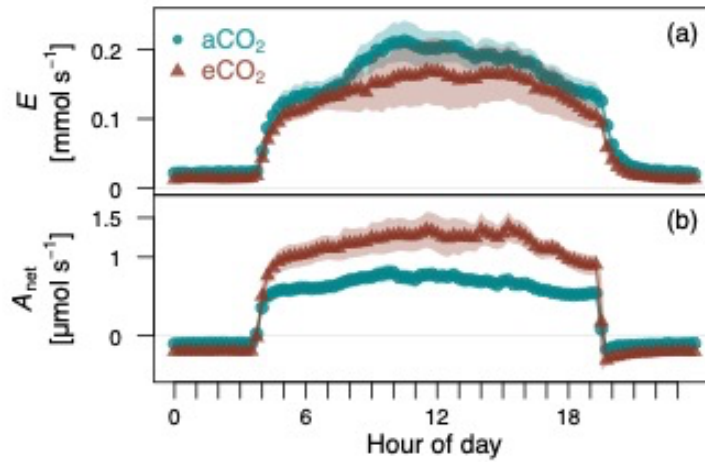

**Supplemental Figure S3.** Tree-level transpiration and photosynthesis. Diurnal course of tree-level transpiration ( $E$ ) (a) and tree-level net photosynthesis ( $A_{\text{net}}$ ) under ambient ( $a\text{CO}_2$ ) and elevated  $\text{CO}_2$  ( $e\text{CO}_2$ ). Shown are quarter-hourly treatment means over three ( $a\text{CO}_2$ ) and four ( $e\text{CO}_2$ ) days of acclimation with shaded areas depicting  $\pm$  standard deviation ( $n = 6$  seedlings per treatment).
